# Supplementary material for: B cells in the peritumor region of primary colorectal cancer and synchronous liver metastasis associate with longer survival
Source: Research Square preprint supplement (doi:10.21203/rs.3.rs-8018529/v1), 2025-11-24
Supplement: Supplementary file 1 [file 959d956b7497582459d63b92.docx]

Table S1 The estimated probability of outcomes for patients in synchronous and metachronous groups in Kaplan-Meier analysis.

|  |  | 1y | 3y | 5y |
| --- | --- | --- | --- | --- |
| RFP | Synchronous  metachronous | 37.0% (23.9%-50.2%)  50.0% (35.2%-64.8%) | 11.9% (2.9%-21.0%)  17.6% (5.8%-29.3%) | 7.3% (0%-15.5%)  Not applicable1 |
| DFS | Synchronous  metachronous | 35.4% (22.7%-48.2%)  50.0% (35.2%-64.8%) | 11.4% (2.7%-20.1%)  17.6% (5.8%-29.3%) | 7.0% (0%-14.8%)  Not applicable1 |
| OS4 | Synchronous  metachronous | 87.2% (78.3%-96.1%)  93.2% (85.7%-100.0%) | 51.9% (38.3%-65.5%)  62.6% (47.7%-77.5%) | 31.3% (17.9%-44.8%)  34.8% (17.0%–52.7%) |

Notes: 1 there were no complete observations after 5 years.

Abbreviations: RFP: recurrence-free proportion; DFS: disease-free survival; OS: overall survival. estimated probability of outcomes (95% confidence interval)

Table S2 Hazard ratios for DFS between high vs low CD20+ cell densities per individual ROIs of pCRC and LM in CRC patients with synchronous and metachronous metastases.

|  |  | Synchronous |  | Metachronous |
| --- | --- | --- | --- | --- |
|  | N | HR (95% CI), p-value | N | HR (95% CI), p-value |
| pTC | 42 (77.8) | 0.80 (0.40-1.57), p=0.51 | 31 (72.1) | 1.88 (0.89-3.97), p=0.10 |
| pIM | 43 (79.6) | 0.63 (0.31-1.28), p=0.20 | 30 (69.8) | 0.71 (0.35-1.44), p=0.34 |
| pOM | 42 (77.8) | 0.74 (0.37-1.50), p=0.41 | 31 (72.1) | 0.86 (0.43-1.73), p=0.68 |
| pPT | 41 (75.9) | 0.97 (0.48-1.95), p=0.93 | 31 (73.8) | 1.08 (0.52-2.26), p=0.83 |
| mTC | 40 (74.1) | 0.64 (0.33-1.24), p=0.19 | 33 (75.0) | 1.33 (0.64-2.76), p=0.44 |
| mIM | 41 (74.5) | 0.99 (0.51-1.91), p=0.97 | 32 (72.7) | 1.13 (0.56-2.29), p=0.73 |
| mOM | 41 (74.5) | 0.66 (0.34-1.29), p=0.23 | 33 (75.0) | 0.83 (0.40-1.70), p=0.60 |
| mPT | 36 (65.5) | 0.63 (0.35-1.16), p=0.14 | **38 (86.4)** | **0.35 (0.13-0.89), p=0.03** |

Abbreviations: DFS: disease-free survival. ROI: regoin of interest. pCRC: primary colorectal cancer. pTC: Tumor center in pCRC; pIM: Inner margin in pCRC; pOM: Outer margin in pCRC; pPT: Peritumor area in pCRC; mTC: Tumor center in metastasis; mIM: Inner margin in LM; mOM: Outer margin in LM; mPT: Peritumor area in LM. N: number of patients with high cell densitied and propotion. HR (95% CI): Hazard ratio (95% confidence interval) shows the relative risk compared with 1.00 for the low density.

Table S3 Hazard ratios for TTR between high vs low CD20+ cell densities per individual ROIs of pCRC and LM in CRC patients with synchronous and metachronous metastases.

|  |  | Synchronous |  | Metachronous |
| --- | --- | --- | --- | --- |
|  | N | HR (95% CI), p-value | N | HR (95% CI), p-value |
| pTC | 42 (77.8) | 0.74 (0.37-1.47), p=0.39 | 31 (72.1) | 1.88 (0.89-3.97), p=0.10 |
| pIM | 43 (79.6) | 0.57 (0.28-1.18), p=0.13 | 30 (69.8) | 0.71 (0.35-1.44), p=0.34 |
| pOM | 42 (77.8) | 0.69 (0.34-1.40), p=0.30 | 31 (72.1) | 0.86 (0.43-1.73), p=0.68 |
| pPT | 41 (75.9) | 0.91 (0.45-1.85), p=0.80 | 31 (73.8) | 1.08 (0.52-2.26), p=0.83 |
| mTC | 40 (74.1) | 0.77 (0.38-1.57), p=0.47 | 33 (75.0) | 1.33 (0.64-2.76), p=0.44 |
| mIM | 41 (74.5) | 1.05 (0.53-2.09), p=0.88 | 32 (72.7) | 1.13 (0.56-2.29), p=0.73 |
| mOM | 41 (74.5) | 0.70 (0.35-1.39), p=0.31 | 33 (75.0) | 0.83 (0.40-1.70), p=0.60 |
| mPT | 36 (65.5) | 0.72 (0.38-1.34), p=0.30 | **38 (86.4)** | **0.35 (0.13-0.89), p=0.03** |

Abbreviations: TTR:time to reccurence. ROI: regoin of interest. pCRC: primary colorectal cancer. TC: Tumor center in pCRC; pIM: Inner margin in pCRC; pOM: Outer margin in pCRC; pPT: Peritumor area in pCRC; mTC: Tumor center in metastasis; mIM: Inner margin in LM; mOM: Outer margin in LM; mPT: Peritumor area in LM. N: number of patients with high cell densitied and propotion. HR (95% CI): Hazard ratio (95% confidence interval) shows the relative risk compared with 1.00 for the low density. Note: TTR and DFS were identical in metachronous group.

Table S4 Association between immune cell densities and clinical and pathological variables in CRC patients with synchronous and metachronous metastases.

|  |  |  | Synchronous | | | | Metachronous | | | |
| --- | --- | --- | --- | --- | --- | --- | --- | --- | --- | --- |
|  |  |  | TC | IM | OM | PT | TC | IM | OM | PT |
| Gender | Male | pCRC  LM | 31 (1-463)  12 (0-1256) | 25 (1-620)  42 (0-1596) | 179 (30-1184)  308 (66-1918) | 246 (16-1663)  235 (20-1333) | 25 (2-338)  11 (1-413) | 15 (1-1032)  39 (0-468) | 103 (11-1345)  272 (2-1361) | 133 (4-1493)  205 (32-1711) |
| Female | pCRC  LM | 22 (2-326)  13 (1-303) | 16 (1-374)  20 (4-711) | 89 (2-667)  293 (42-3145) | 127 (3-1065)  164 (24-1210) | 73 (3-359)  15 (1-207) | 25 (2-898)  39 (8-247) | 255 (8-979)  396 (150-552) | 188 (3-1326)  239 (142-874) |
| Age | <=62 (syn)  <=63.5 (met) | pCRC  LM | 31 (6-288)  16 (1-1256) | 21 (1-620)  43 (0-1596) | 121 (5-1184)  295 (42-3145) | 150 (11-1663)  167 (20-1333) | 43 (2-235)  10 (1-212) | 21 (1-285)  37 (0-468) | 143 (22-979)  352 (2-1290) | 100 (3-1111)  236 (32-810) |
| >62 (syn)  >63.5 (met) | pCRC  LM | 24 (1-463)  11 (0-360) | 20 (1-374)  34 (5-940) | 173 (2-1127)  306 (51-1918) | 226 (3-1296)  216 (43-857) | 25 (3-359)  15 (1-413) | 16 (2-1032)  41 (2-247) | 116 (8-1345)  312 (40-1361) | 188 (4-1493)  223 (58-1711) |
| Location | Right side colon | pCRC  LM | 68 (4-4334)  11 (2-1256) | 60 (3-229)  37 (5-1596) | 355 (51-1127)  235 (101-1464) | 184 (29-1296)  215 (20-653) | 36 (3-157)  20 (1-413) | 36 (4-898)  60 (5-247) | 398 (66-979)  298 (60-1361) | 963 (188-1493)  218 (67-1711) |
| Left side colon | pCRC  LM | 24 (1-463)  13 (0-392) | 16 (1-620)  34 (0-940) | **124 (2-1184)** *  306 (42-3145) | 198 (3-1663)  213 (24-1333) | 40 (2-359)  10 (1-212) | 20 (1-1032)  37 (0-468) | 101 (8-1345)  335 (2-1290) | **87 (3-1097)** ***  236 (32-874) |

Table S4 (Continued) Association between immune cell densities and clinical and pathological variables in CRC patients with synchronous and metachronous metastases.

|  |  |  | Synchronous | | | | Metachronous | | | |
| --- | --- | --- | --- | --- | --- | --- | --- | --- | --- | --- |
|  |  |  | TC | IM | OM | PT | TC | IM | OM | PT |
| Grade | 1 | pCRC  LM | 37 (1-463)  11 (1-392) | 20 (2-374)  29 (0-645) | 130 (30-445)  220 (66-1604) | 226 (31-704)  200 (53-1333) | 22 (2-359)  12 (1-413) | 13 (1-898)  29 (0-247) | 158 (8-813)  365 (2-1361) | 87 (10-1493)  251 (58-1711) |
| 2 | pCRC  LM | 25 (2-434)  13 (0-1256) | 21 (1-620)  42 (3-1596) | 138 (2-1184)  336 (42-3145) | 214 (3-1663)  215 (20-1210) | 43 (5-338)  9 (1-212) | 22 (1-1032)  37 (2-468) | 115 (12-1345)  335 (40-1244) | 177 (3-1111)  221 (32-874) |
| 3 | pCRC  LM | 32 (21-178)  18 (6-29) | 16 (4-84)  35 (13-113) | 162 (32-313)  254 (67-443) | 80 (28-251)  245 (24-728) | 30 (10-81)  25 (7-66) | 21 (14-25)  74 (11-180) | 139 (29-439)  255 (228-1290) | 81 (28-502)  223 (181-724) |
| N stage | 0 | pCRC  LM | 24 (4-463)  11 (2-350) | 15 (3-112)  18 (5-190) | 196 (23-667)  296 (145-1604) | 194 (36-1065)  216 (67-1333) | 16 (2-359)  14 (1-413) | 13 (1-210)  39 (0-147) | 71 (16-813)  403 (52-1361) | 62 (3-1493)  264 (114-1711) |
| 1 | pCRC  LM | 31 (2-326)  10 (0-392) | 15 (1-620)  45 (4-645) | 96 (2-1184)  229 (42-669) | 164 (3-704)  168 (24-853) | 21 (7-163)  6 (1-28) | 18 (1-64)  17 (1-130) | 106 (8-788)  303 (2-1244) | 188 (13-1097)  217 (58-874) |
| 2 | pCRC  LM | 30 (1-434)  22 (1-1256) | 46 (2-229)  35 (0-1596) | 196 (30-1127)  363 (46-3145) | 251 (12-1663)  249 (20-1210) | 75 (8-338)  25 (2-212) | 32 (7-1032)  46 (8-468) | 308 (12-1345)  328 (58-1290) | 169 (4-1326)  205 (32-810) |
| pCRC size | <4.4cm (syn)  <=3.5cm (met) | pCRC  LM | 31 (2-326)  13 (0-392) | 14 (1-374)  55 (0-711) | 96 (5-1061)  303 (42-3145) | 198 (11-1663)  215 (26-1333) | 40 (3-359)  16 (1-413) | 15 (2-1032)  41 (8-247) | 115 (8-1345)  339 (58-1361) | 100 (3-1493)  238 (62-1711) |
| >=4.4cm (syn)  >3.5cm (met) | pCRC  LM | 24 (1-463)  12 (1-1256) | **32 (1-620)** *  29 (3-1596) | 196 (2-1184)  299 (51-1918) | 184 (3-1296)  213 (20-857) | 34 (2-235)  10 (1-212) | 21 (1-210)  20 (0-468) | 167 (11-979)  282 (2-1244) | 258 (7-1111)  190 (32-874) |
| Number of LM | =1 | pCRC  LM | 28 (1-463)  11 (0-360) | 14 (1-217)  42 (0-940) | 140 (2-1061)  306 (51-1918) | 170 (3-1663)  228 (24-1333) | 22 (2-338)  9 (1-207) | 20 (1-1032)  21 (0-247) | 129 (8-1345)  272 (2-1244) | 146 (3-1326)  211 (62-874) |
| >1 | pCRC  LM | 33 (2-434)  14 (1-1256) | 25 (3-620)  27 (4-1596) | 147 (5-1184)  272 (42-3145) | 243 (11-1296)  171 (20-1210) | 42 (3-359)  22 (1-413) | 22 (3-210)  47 (2-468) | 158 (11-813)  457 (40-1361) | 188 (4-1493)  275 (32-1711) |
| Size of LM | <2cm (syn)  <2.7cm (met) | pCRC  LM | 31 (9-326)  13 (0-1256) | 22 (1-620)  96 (0-1596) | 176 (5-1184)  310 (42-3145) | 318 (11-1663)  132 (20-1210) | 46 (3-338)  14 (1-207) | 21 (2-1032)  42 (2-247) | 148 (11-1345)  312 (40-1290) | 133 (3-1326)  202 (58-724) |
| >=2cm (syn)  >=2.7cm (met) | pCRC  LM | 27 (1-463)  11 (1-350) | 17 (1-229)  **25 (3-385)** * | 87 (2-1127)  291 (51-1604) | **124 (3-1296)** *  235 (43-1333) | 24 (2-359)  8 (1-413) | 20 (1-285)  26 (0-468) | 116 (8-813)  339 (2-1361) | 153 (7-1493)  258 (32-1711) |
| Grade of LM | 1 | pCRC  LM | 25 (4-434)  9 (1-391.6) | 18 (1-229)  21 (5-645) | 86 (2-1127)  247 (51-855) | 124 (3-1296)  213 (24-337) | 19 (2-235)  14 (1-413) | 13 (1-898)  18 (0-468) | 115 (8-813)  286 (2-1361) | 98 (7-1493)  240 (32-1711) |
| 2 | pCRC  LM | 30 (2-463)  14 (0-1256) | 20 (1-620)  **60 (0-1596)** * | 196 (5-1184)  378 (42-3145) | 249 (11-1663)  221 (20-1333) | 51 (5-359)  10 (2-79) | 22 (1-285)  41 (2-180) | 110 (12-979)  352 (40-1290) | 139 (3-1111)  236 (62-874) |
| LM resection margin | R0 | pCRC  LM | 26 (1-326)  12 (0-1256) | 20 (1-374)  29 (0-1596) | 140 (2-445)  295 (51-3145) | 170 (3-890)  215 (20-1333) | 42 (3-359)  9 (1-212) | 20 (1-1032)  21 (1-468) | 135 (8-1345)  272 (2-1244) | 139 (3-1111)  205 (32-874) |
| R1 | pCRC  LM | 111 (14-463) *  20 (6-392) | 37 (3-620)  55 (16-645) | 153 (5-1184)  357 (42-855) | 253 (11-1663)  200 (24-857) | 16 (2-235)  19 (1-413) | 22 (1-285)  46 (0-180) | 115 (12-813)  510 (52-1361) | 188 (4-1493)  318 (62-1711) |

Abbreviations: pCRC: primary CRC; LM: metastasis of CRC. TC: Tumor center; IM: Inner margin; OM: Outer margin; PT: Peritumor area. Syn: synchronous; met: metachronous. R0 indicates that no tumor cells are seen microscopically. R1 indicates that tumor cells can be seen microscopically. Numbers in the table are median cell densities (minimum-maximum), *p<0.05, **p<0.01.
